# Supplementary figures and images for: When complex neuronal structures may not matter
Source: eLife journal article supplement (doi:10.7554/elife.23508), 2017-02-06

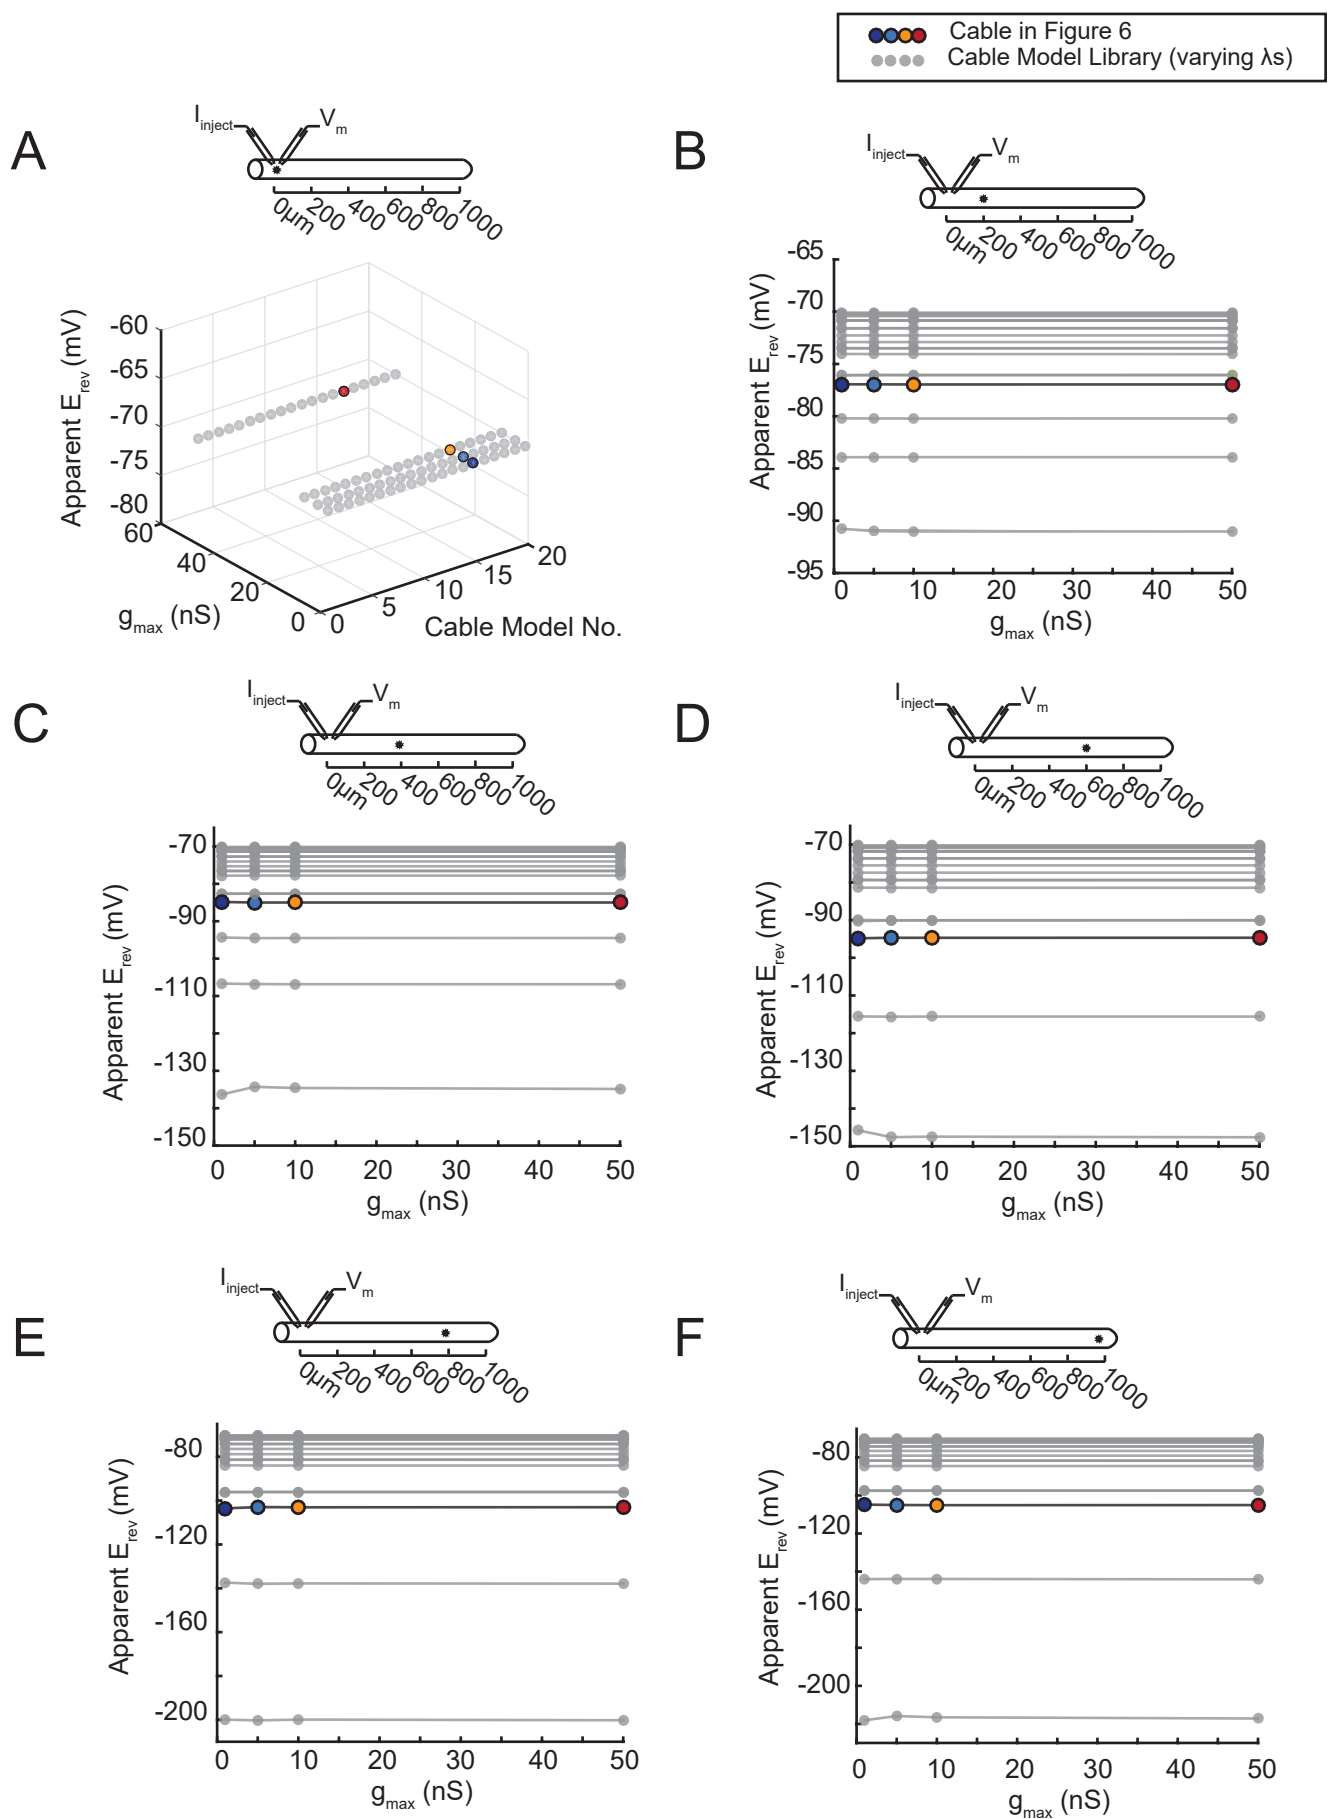

Supplement to Figure 6

Supplement: supp [file elife-23508-supp-v1.zip]

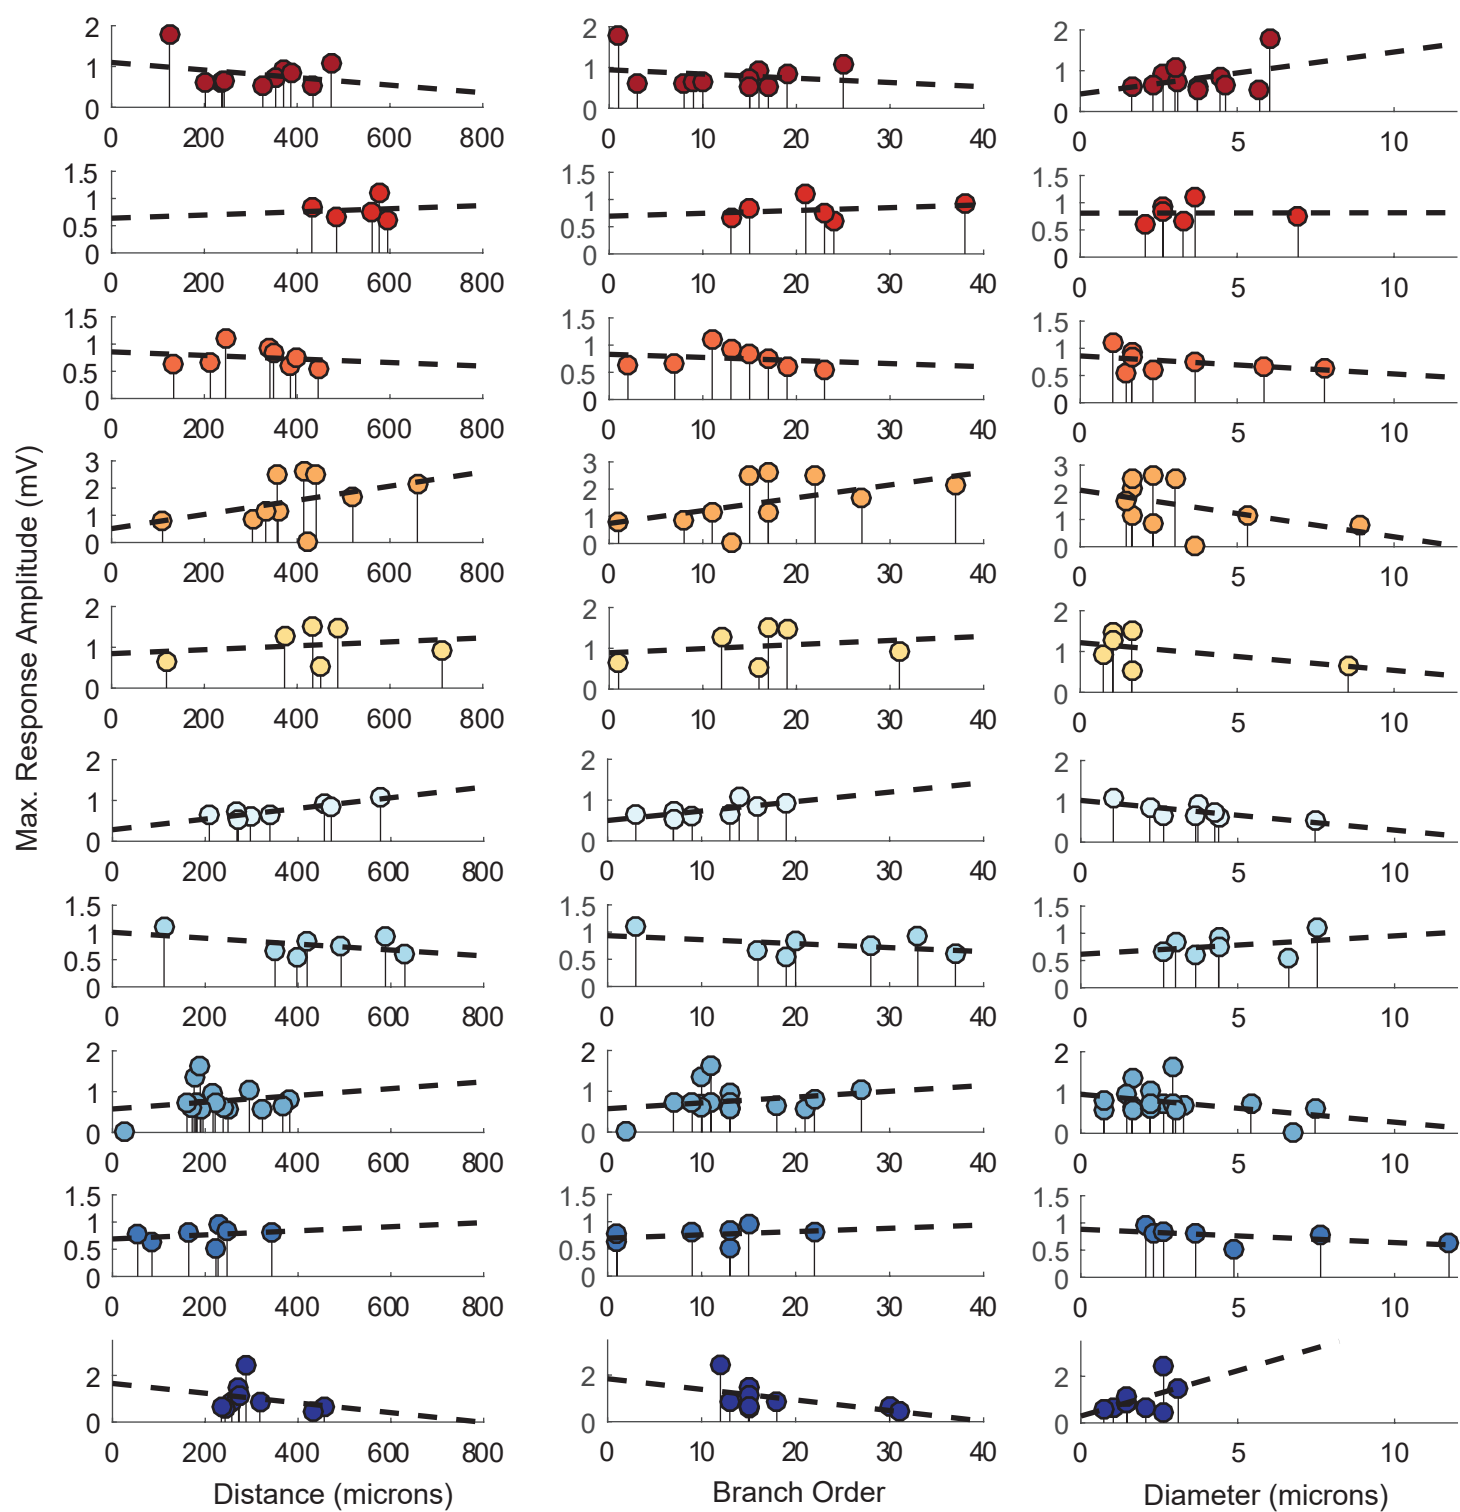

Supplement to Figure 5

Supplement: supp [file elife-23508-supp-v1.zip]

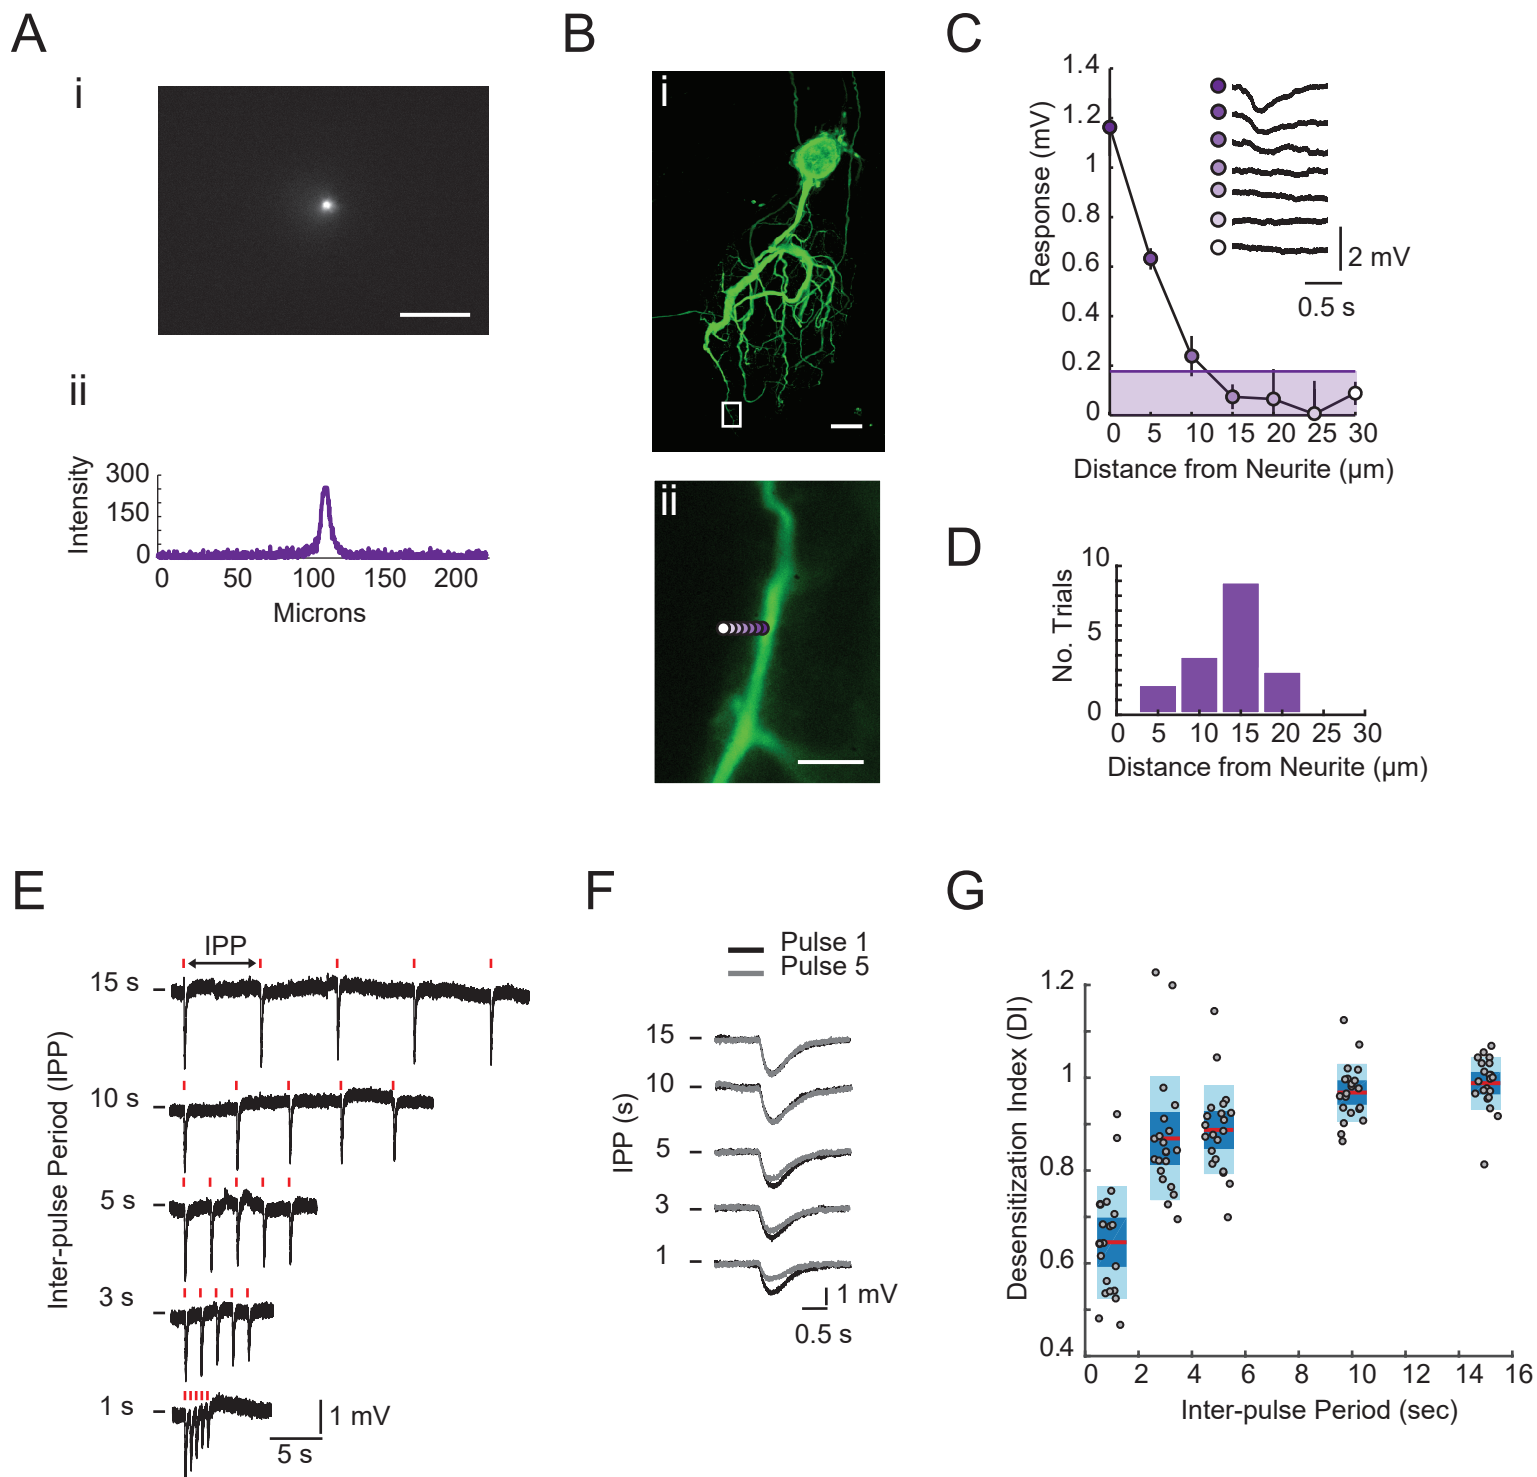

Supplement to Figure 4

Supplement: supp [file elife-23508-supp-v1.zip]

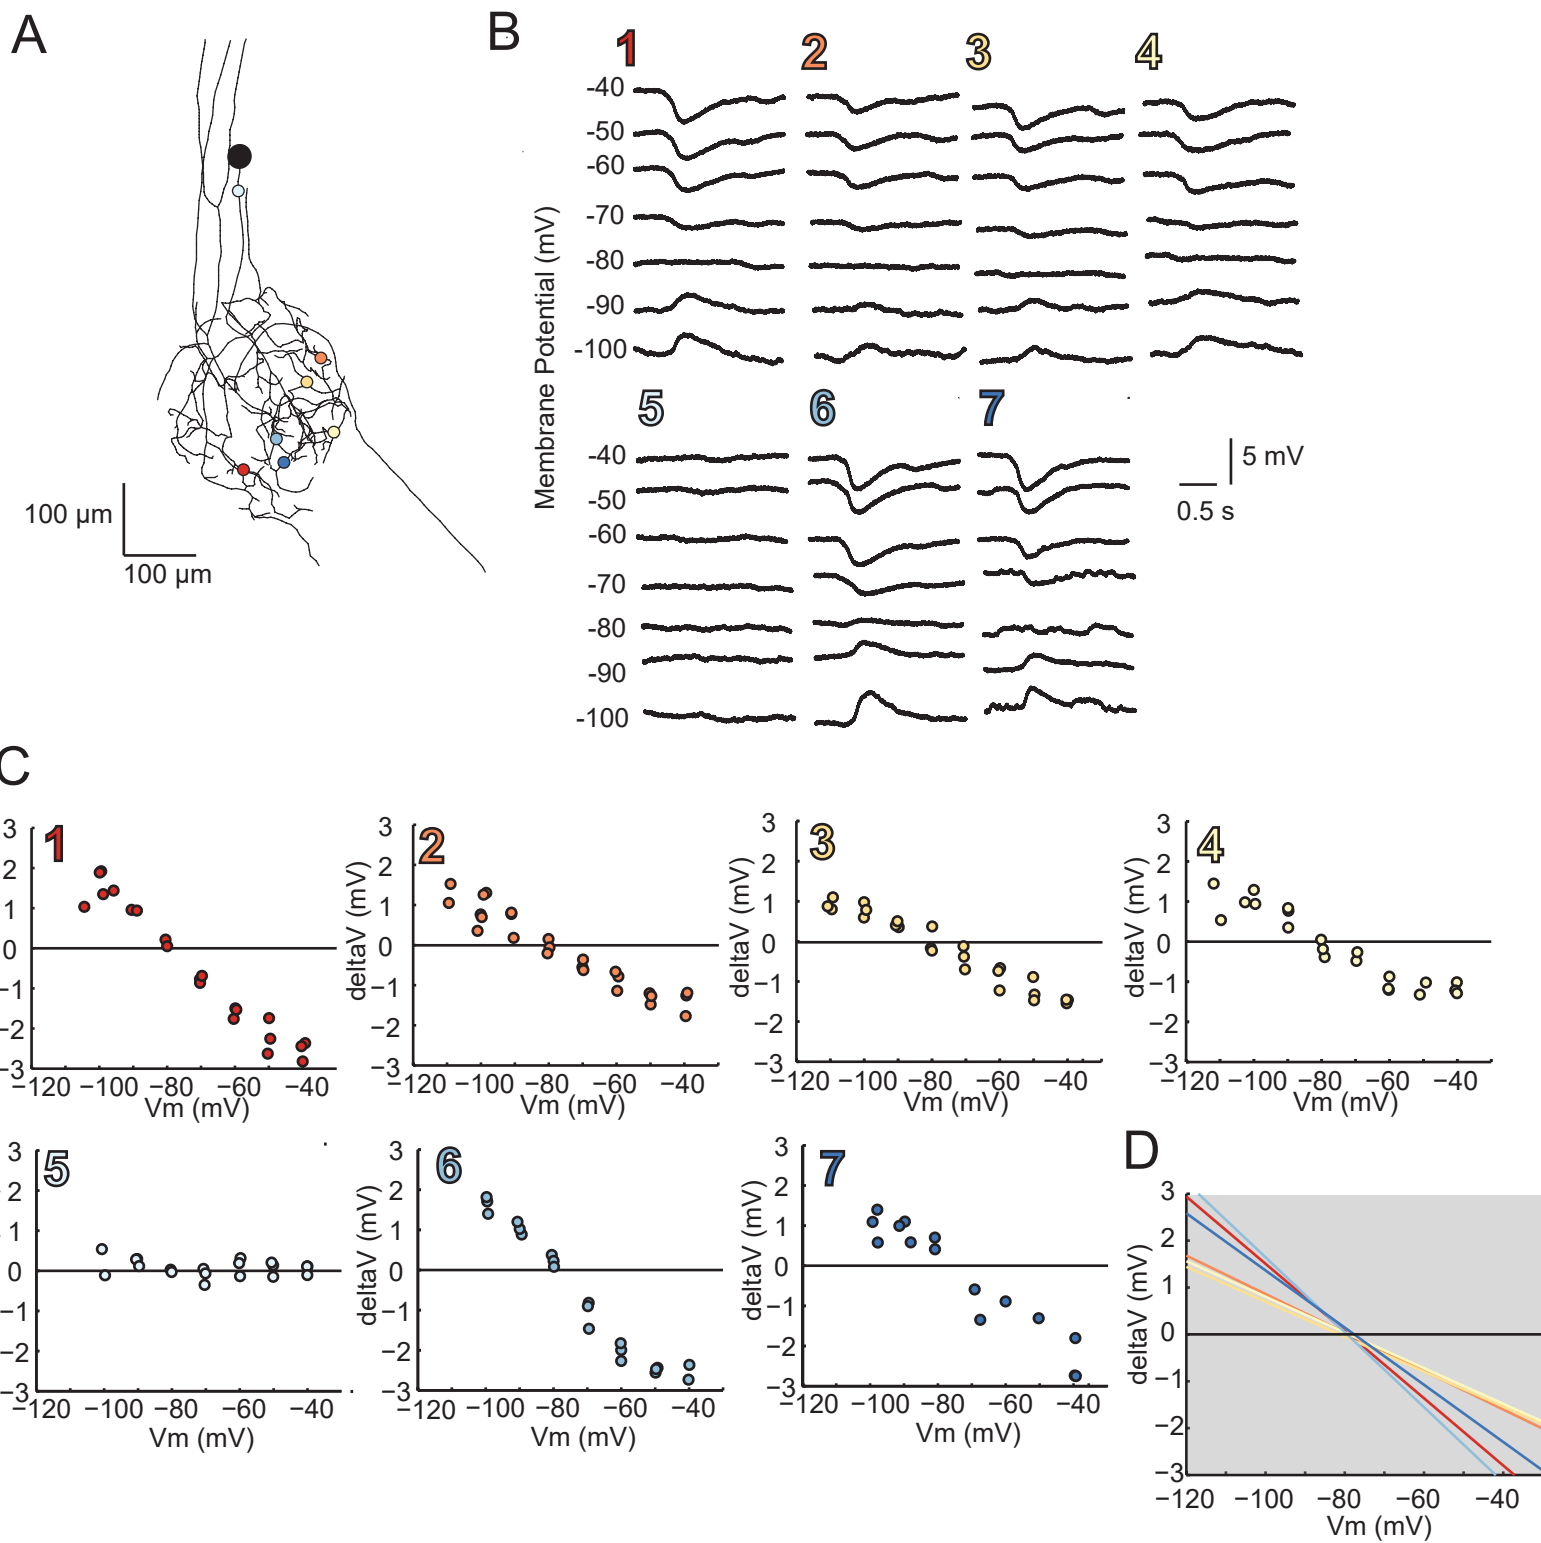

Supplement to Figure 8

Supplement: supp [file elife-23508-supp-v1.zip]

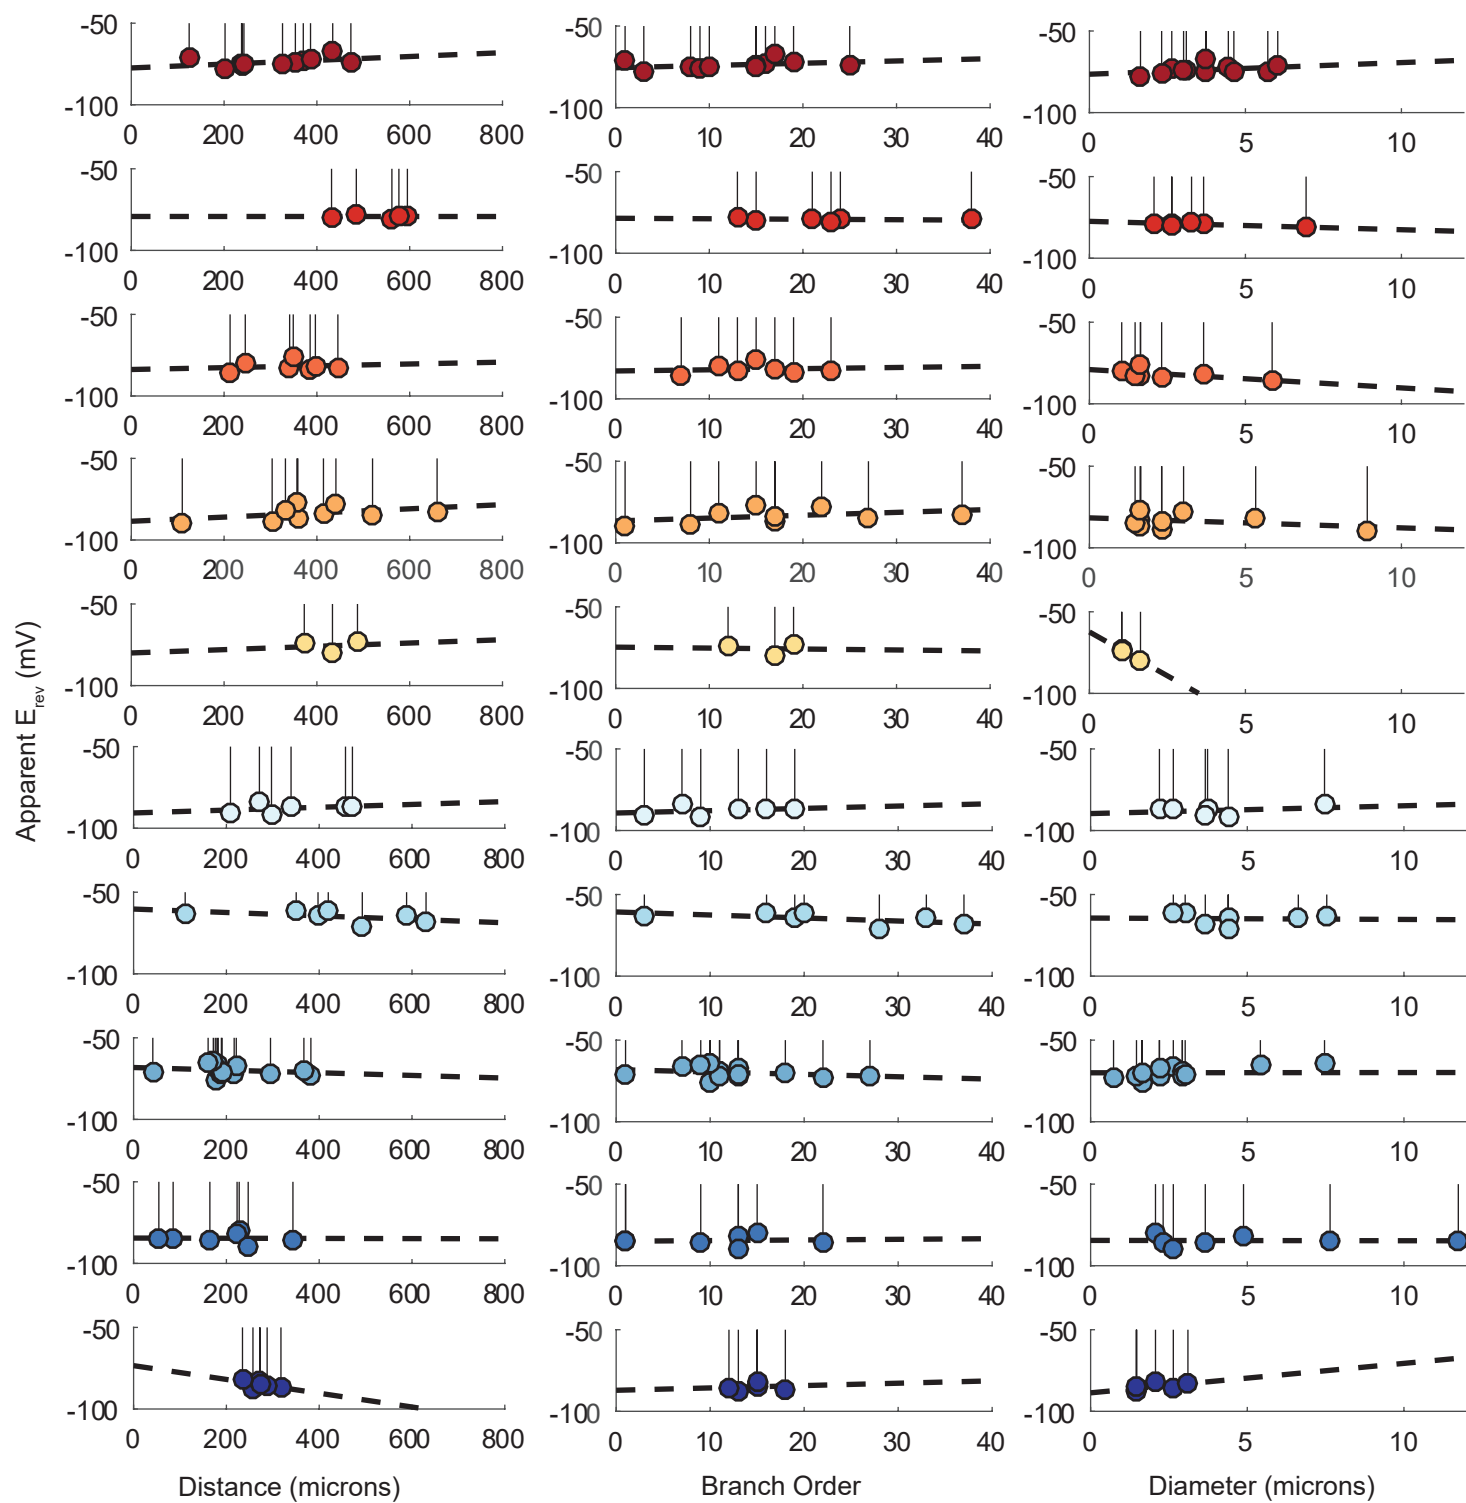

Supplement to Figure 9

Supplement: supp [file elife-23508-supp-v1.zip]
